# Supplementary material
Source: bioRxiv or medRxiv preprint supplement (http://biorxiv.org/highwire/filestream/105893/field_highwire_adjunct_files/0/349134-1.pdf)
Supplement: Supplementary file [file 349134-1.pdf]

1 **SUPPLEMENTARY MATERIALS**

2 **Foster et al.**

---

3

4

5 ALB1 the native locus at the target sequence

6 GCCACAAGCTCCCTCACCAAGGCCACGGCCATCCTCGTCTACGGCCCGTACCACGCCCCCCACCTCCACCGCCCTGAGGATGTCGACAACATCC

7 TGGGCCTCAACAACCCCGAGATGATTGACACCTTCTCAACACCAAGCCCGCTCCTCCGTCATGTCC

8

9 Alb-(1)top (donor DNA to introduce a stop codon within the genomic target sequence)

10 CTCCTCACCAAGGCCACGGCCATCCTCGTCTACGGCCCGTAGCAGGCCCCCCACCTCCACCGCCCTGAGGATGTCGAC

11 Alb-(1)bot (this oligo is annealed to Alb-(1)top to form a dsDNA donor)

12 GTCGACATCCTCAGGGCGGTGGAGGTGGGGGGCGTGCTACGGGCCGTAGACCGGGATGGCCGTGGCCTTGGTGAGGGAG

13

14 Alb1-(2) top (donor DNA to introduce a stop codon at a distance from the genomic target  
15 sequence)

16 CTCCTCACCAAGGCCACGGCCATCCTCGTCTACGGCCCGTAGCAGGCCCCCCACCTCCACCGCCCTTAGGATGTCGAC

17 Alb-(2)bot (this oligo is annealed to Alb1-(1)top to form a dsDNA donor)

18 GTCGACATCCTAAGGGCGGTGGAGGTGGGGGGCGTGCTACGGGCCGTAGACCGGGATGGCCGTGGCCTTGGTGAGGGAG

19

20 **Figure S1. Oligonucleotide donors used in RNP-CRISPR-Cas9 co-editing experiments to introduce a**  
21 **premature stop codon in ALB1.**

22 The oligonucleotide donors used to target *ALB1* by introducing a premature stop codon are  
23 illustrated together with the genomic target sequence for the *ALB1* targeting RNP-CRISPR-Cas9  
24 complex. In the case of donor 1-1 the edit is within the genomic target sequence whereas in the case  
25 of donor 1-2 the edit is located 40 bp away from the PAM site used. DsDNA donors were generated  
26 by mix equimolar concentrations of the 'top' and 'bot' oligo together heating at 95oC for 5 mins and  
27 then cooling on the bench top. 2 µg of annealed oligo was transformed together with the *ALB1*  
28 targeting RNP

29

30

31

32

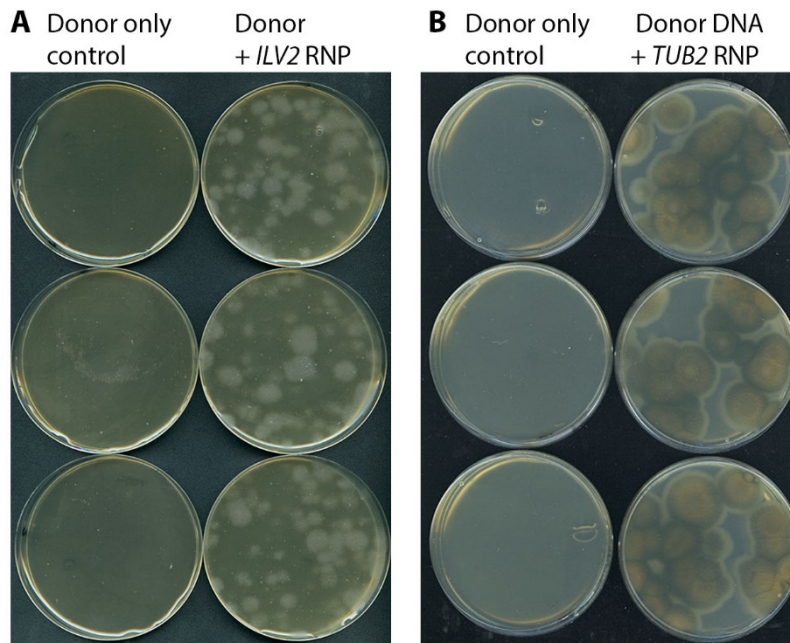

**C**

MGG\_06868 *ILV2* - crispr mediated chlorimuron ethyl resistant allele (A to D substitution at amino acid)

Genomic target seq **GGCGTCGCTTCCAATAGCAG**<sub>198</sub>

Donor oligos used

SUR<sub>top</sub>  
GTAITTCAGGACAGGTTGTTA**CCCTCGaTATTGGAAAGCGACGC**CTCCAGGAGGCCGACGTGATAGGCAITCICCGGTC

SUR<sub>bot</sub>  
GACCGGGAGATGCCTATGACGTCGGCCTCCTGGAAGCGTCGCTTCCAATA**CCAGAGGTAACACCTGTCCTGAGAATAC**

D G T P L V V F S G Q V V T S **d** I G S D A F  
CCGACGGTACACCTCTGGTTGTATTCTCAGGACAGGTTGTTA**CCCTCGaTATTGGAAAGCGACGC**CTTC

SulphR TPMDALADGTPLVVFSGQVVIS**D**IGSDAFQEADVIGISRSCIKWNVVKS

Wt TPMDALADGTPLVVFSGQVVIS**S**IGSDAFQEADVIGISRSCIKWNVVKS

**D**

*TUB2* RNP Genomic target **GACCAGCTGGTGGACCGAGA**<sub>198</sub>

E > A (GAG > GCG) edit at position 198

V V E P Y N A T L S V H Q L V E N S D E T F C I D  
GTCGTT**GAG**CCCTACAACGCTA**CCCTCTCGGTCCACCAGCTGGTC**GAGAACTCTGAC**G**AGACCTCTGCATTGAC

N E A L Y D I C M R T L K L S N P S Y G D L N Y L  
AACGAGGCTCTGTACGACATCTGCATCGGCACCTGAAGCTGTCGAACCCCTCATACCGTGACCTGAACCTACCTG

Edited at 198  
GTCGTT**GAG**CCCTACAACGCTA**CCCTCTCGGTCCACCAGCTGGTC**GAGAACTCTGAC**G**AGACCTCTGCATTGAC

Donor oligos used  
benR-top GTCGTTGAGCCCTACAACGCTACCCCTCTCGGTCCACCAGCTGGTCGAGAACTCTGACG**G**AGACCTCTGCATTGACAAACGA

benR-bot TCGTTGTCAATCCAGAAAGGTC**G**CTCAGAGTTCTCGAACCAAGCTGCTGGACCGAGAGGGTACCGTTGTAGGGCTCAACGAC

33

34 **Figure S2. Oligonucleotide donors used in RNP-CRISPR-Cas9 co-editing experiments targeting *TUB2***  
 35 **or *ILV2* and plates showing the selection procedure and the results of the transformation with the**  
 36 **appropriate RNP complex.**

37 **a.** Transformation plates are shown for the *ILV2*-targeting RNP transformed together with the donor  
 38 DNAs shown in **c**. **b.** Transformation plates are shown for the *TUB2*-targeting RNP transformed  
 39 together with the donor DNAs shown in **d**. In **c** and **d** the design of the oligonucleotides conferring  
 40 resistance to sulfonylurea and benomyl respectively is illustrated with their location relative to the  
 41 genomic target sequence for the respective RNP complex.  
 42

43

44 **Table S1. Raw data for the transformation numbers presented in Fig. 1a using constructs expected**  
 45 **to stably and constitutively express Cas9**

46

|                         | Empty vector <sup>a</sup> | <i>ALB1</i><br>targeting<br>vector <sup>b</sup> | <i>PKS1</i><br>targeting<br>vector <sup>c</sup> |
|-------------------------|---------------------------|-------------------------------------------------|-------------------------------------------------|
| Number of transformants |                           |                                                 |                                                 |
| Experiment 1            | 67                        | 2                                               | 2                                               |
| Experiment 2            | 52                        | 1                                               | 6                                               |
| Experiment 3            | 64                        | 0                                               | 1                                               |
| Experiment 4            | 83                        | 3                                               | 1                                               |

47 *Agrobacterium* compatible vectors containing the Cas9-NLS encoding gene under the control of the TrpC  
 48 promoter and terminator were introduced into Guy 11 using *Agrobacterium*-mediated transformation.  
 49 Transformant numbers were assessed after 7 days on selective medium (transformants were  
 50 subsequently sub-cultured for assessment of pigmentation after growth on CM). None of the  
 51 transformants isolated exhibited pigmentation defects. Three different versions (including the version  
 52 functional in *N. crassa* (Matsu-Ura et al., 2015) shown used here) of the Cas9-NLS-encoding gene codon  
 53 optimised for different fungi were tested in all every time with the same result that very few  
 54 transformants were generated and none of these exhibited pigmentation alterations (data not shown).

55

56

57

58

59

60

61

62

63

64

65 **Table S2. Summary of transformation experiments targeting *ALB1* and *RSY1* using the RNP-Crispr method**  
 66 **and donor only controls**

| <u>RNPs donors used</u>                  | <u>Number of transformants</u> | <u>Number that are albino/rosy</u> | <u>Efficiency (%)</u> |
|------------------------------------------|--------------------------------|------------------------------------|-----------------------|
| <i>ALB1</i> Donor DNA + <i>ALB1</i> -RNP | 4                              | 4                                  | 100 %                 |
| Control: <i>ALB1</i> Donor DNA only      | 2                              | 0                                  | 0 %                   |
| <i>ALB1</i> Donor DNA + <i>ALB1</i> RNP  | 112                            | 96                                 | 86 %                  |
| <i>ALB1</i> Donor DNA only               | 64                             | 3                                  | 5%                    |
| <i>ALB1</i> Donor DNA + <i>ALB1</i> RNP  | 16                             | 8                                  | 50 %                  |
| <i>ALB1</i> Donor DNA only               | 11                             | 1                                  | 9 %                   |
| <i>ALB1</i> Donor DNA + <i>ALB1</i> RNP  | 76                             | 54                                 | 71 %                  |
| <i>ALB1</i> Donor DNA only               | 43                             | 5                                  | 12 %                  |
| <i>ALB1</i> Donor DNA + <i>ALB1</i> RNP  | 86                             | 69                                 | 80 %                  |
| Donor DNA only                           | 48                             | 7                                  | 14 %                  |
| <i>RSY1</i> Donor DNA + <i>RSY1</i> RNP  | 20                             | 20                                 | 100 %                 |
| Control: <i>RSY1</i> Donor DNA only      | 3                              | 0                                  | 0 %                   |
| <i>RSY1</i> Donor DNA + <i>RSY1</i> RNP  | 38                             | 37                                 | 97.5 %                |
| Control: <i>RSY1</i> Donor DNA only      | 8                              | 1                                  | 12.5 %                |
| <i>RSY1</i> Donor DNA + <i>RSY1</i> RNP  | 12                             | 12                                 | 100 %                 |
| Control: <i>RSY1</i> Donor DNA only      | 13                             | 1                                  | 8 %                   |
| <i>RSY1</i> Donor DNA + <i>RSY1</i> RNP  | 61                             | 60                                 | 98 %                  |
| Control: <i>RSY1</i> Donor DNA only      | 47                             | 5                                  | 11 %                  |

67 The number of transformants for individual transformation experiments using *ALB1*-trageting-RNP-  
 68 CRISPR-Cas9 or *RSY1*-targeting RNP-CRISPR-Cas9 complexes are shown. Also shown are donor only  
 69 controls which show the efficiency obtained in the absence of the RNP complex and illustrate the  
 70 efficiency of gene targeting which would be obtained in a 'traditional' gene deletion experiment.  
 71

72 **Table S3. Summary of transformation experiments targeting *ALB1* using the RNP-Crispr method and PCR**  
 73 **amplified donor DNAs with 40 bp or 30 bp regions of homology to *ALB1* at either end**  
 74

| <u>RNPs</u>      | <u>Donor</u> | <u>Number of</u><br><u>transformants</u> | <u>No. of albino</u><br><u>mutants</u> | <u>Efficiency (%)</u> |
|------------------|--------------|------------------------------------------|----------------------------------------|-----------------------|
| <i>ALB1</i> -RNP | 40 bp flanks | 11                                       | 8                                      | 73 %                  |
| None             | 40 bp flanks | 5                                        | 0                                      | 0 %                   |
| <i>ALB1</i> RNP  | 40 bp flanks | 48                                       | 27                                     | 56 %                  |
| None             | 40 bp flanks | 37                                       | 0                                      | 0%                    |
| <i>ALB1</i> RNP  | 40 bp flanks | 16                                       | 10                                     | 63 %                  |
| None             | 40 bp flanks | 22                                       | 0                                      | 0 %                   |
| <i>ALB1</i> -RNP | 30 bp flanks | 29                                       | 17                                     | 59 %                  |
| None             | 30 bp flanks | 12                                       | 0                                      | 0 %                   |
| <i>ALB1</i> -RNP | 30 bp flanks | 50                                       | 28                                     | 56 %                  |
| None             | 30 bp flanks | 59                                       | 0                                      | 0 %                   |
| <i>ALB1</i> -RNP | 30 bp flanks | 24                                       | 11                                     | 46 %                  |
| None             | 30 bp flanks | 21                                       | 0                                      | 0 %                   |

75 The number of transformants for individual transformation experiments using *ALB1*-targeting-RNP-  
 76 CRISPR-Cas9 complexes in combination with the PCR generated donor DNA where a repair template  
 77 with either 30 bp or 40 bp *ALB1* homologous regions flank the *BAR* gene conferring glufosinate-  
 78 ammonium (basta) resistance. Also shown are donor only controls which show the efficiency  
 79 obtained in the absence of the RNP complex.

80

81

82

83

84

85

86 **Table S4. Co-editing experiments based on selection for carboxin, sulfonyleurea or benomyl**  
 87 **resistance**

| RNPs               | Donors                                                                    | Strain        | No. examined | No. of <i>alb1</i> mutants | No with correct edit | Efficiency (%) |
|--------------------|---------------------------------------------------------------------------|---------------|--------------|----------------------------|----------------------|----------------|
| <i>SDI1 + ALB1</i> | <i>SDI1R</i> (80 bp oligos) +<br><i>ALB1 STOP</i> inside<br>target        | Guy 11        | 191          | 5                          | 3                    | 1.6%           |
| <i>SDI1 + ALB1</i> | As above                                                                  | Guy 11        | 276          | 3                          | 3                    | 1.1 %          |
| <i>SDI1 + ALB1</i> | As above                                                                  | Guy 11        | 339          | 4                          | 3                    | 0.9 %          |
| <i>SDI1 + ALB1</i> | As above                                                                  | Guy 11        | 369          | 11                         | 6                    | 1.6 %          |
| <i>SDI1 + ALB1</i> | As above                                                                  | $\Delta Ku70$ | 37           | 3                          | 3                    | 12.3%          |
| <i>SDI1 + ALB1</i> | As above                                                                  | $\Delta Ku70$ | 23           | 0                          | 0                    | 0 %            |
| <i>SDI1 + ALB1</i> | As above                                                                  | $\Delta Ku70$ | 29           | 1                          | 1                    | 3.4 %          |
| <i>SDI1 + ALB1</i> | As above                                                                  | $\Delta Ku70$ | 45           | 3                          | 3                    | 6.7 %          |
| <i>SDI1 + ALB1</i> | <i>SDI1</i> carboxinR(80 bp<br>oligos) <i>ALB1 STOP</i><br>outside target | Guy 11        | 275          | 5                          | 3                    | 1.1%           |
| <i>SDI1 + ALB1</i> | As above                                                                  | Guy 11        | 241          | 2                          | 2                    | 0.8 %          |
| <i>SDI1 + ALB1</i> | As above                                                                  | Guy 11        | 298          | 2                          | 2                    | 0.7 %          |
| <i>SDI1 + ALB1</i> | As above                                                                  | Guy 11        | 351          | 4                          | 2                    | 0.5 %          |
| <i>TUB2 + ILV2</i> | SulfonyleureaR+<br>BenomylR                                               | Guy 11        | 259          | 2                          | 2                    | 0.7 %          |
| <i>TUB2 + ILV2</i> | SulfonyleureaR +<br>BenomylR                                              | Guy 11        | 384          | 4                          | 4                    | 1.0 %          |
| <i>TUB2 + ILV2</i> | SulfonyleureaR +<br>BenomylR                                              | Guy 11        | 256          | 4                          | 4                    | 1.5 %          |

88 The number of transformants generated in co-editing experiments using Guy 11 or the *Ku70*<sup>-</sup> strain (23) are  
 89 shown. Transformants were picked before any pigmentation was apparent. Co-editing-based mutation of *ALB1*  
 90 used the oligonucleotides shown in Fig. S1 where the edit is either within the genomic target sequence (donor  
 91 1-1) of 40 bp distant to the PAM site (donor 1-2). Because *ALB1* mutants might also contain indels rather than  
 92 integrations of the donors all albino strains were also checked by PCR amplification of DNA surrounding the

93 target site and the efficiency is defined as the total number of transformants from those picked that have the  
94 correct integration of the donor DNA confirm by sequencing. In the case of co-editing with the *TUB2* and *ILV2*  
95 targeting CRISPR-Cas9-RNPs sequencing was only performed to check that the desired edits were present. In  
96 the case of *TUB2* indels can be expect to lead to loss of viability so that the efficiency was assessed directly as  
97 the proportion of the sulfonyleurea resistant transformants that were also benomyl resistant. *TUB2* is  
98 MGG\_00604 and *ILV2* is MGG\_06868

99

100

101

102

103

104

105

106

107 **Table S5. Summary of genome reads and assemblies used in the current study**

| Strain | Number of reads <sup>a</sup> | Size of assembly (bp) <sup>b</sup> | Number of scaffolds <sup>b</sup> | N50 contig length (bp) <sup>b</sup> | Mean Coverage <sup>c</sup> |
|--------|------------------------------|------------------------------------|----------------------------------|-------------------------------------|----------------------------|
| Alb1_3 | 25,418,446                   | 38,054,642                         | 3,676                            | 49,277                              | 132.1x                     |
| Alb1_6 | 10,549,692                   | 38,356,752                         | 1,900                            | 78,092                              | 52.9x                      |
| R1     | 30,222,537                   | 38,313,674                         | 3,985                            | 53,480                              | 158.7x                     |
| R2     | 26,471,457                   | 38,078,197                         | 3,727                            | 53,653                              | 139.8x                     |

108 <sup>a</sup>125 base paired-end

109 <sup>b</sup> Genome assembled 'de novo' using SPAdes 3.11.0 (46)

110 <sup>c</sup> mapped against reference genome 70-15 (47) using BWA (48)

111 To determine whether off target mutations had occurred in the sequenced mutants, the two *alb1*  
 112 mutants generated by CRISPR-Cas9-RNP and the two strains that had been through the  
 113 transformation procedure and regenerated but not exposed to RNP complexes were sequenced.  
 114 Sequences were generated using an Illumina HiSeq 2500 with standard reagents and protocols  
 115 producing 125 base paired-end reads. Reads were filtered using the fastq-mcf program from the ea-  
 116 utils package, ea-utils (45): "Command-line tools for processing biological sequencing data";  
 117 <https://github.com/ExpressionAnalysis/ea-utils>). Genomes were assembled 'de novo' using SPAdes  
 118 3.11.0 (46).  
 119

120

121

122

123

124

125

126

127

128

129

130

131

132



| Name                                                                    | Sequence                                                                                        |
|-------------------------------------------------------------------------|-------------------------------------------------------------------------------------------------|
| <u>Primers used in construction of vectors</u>                          |                                                                                                 |
| ALB1-for-EcoRI                                                          | ctaatcaatcgaattcGGATTCTCGCCGAGTTCTAC                                                            |
| ALB1-rev-SpeI                                                           | ctatacaactagtTCACGCCAGTCATCGGAAGTC                                                              |
| ALB1-for                                                                | GGATTCTCGCCGAGTTCTAC                                                                            |
| ALB1-rev                                                                | CATGCCAGGCTTCTCAATCCAG                                                                          |
| RSY-donor-f                                                             | gccgactttgagccaagaagc                                                                           |
| RSY-donor-r                                                             | cccggtgcaagccttacctag                                                                           |
| Cas9-recom-f                                                            | GGATAATTCAATAGGCCAACACACGTTGACGGAGAAGATGATATTGAAGGAGCATTTTTGG                                   |
| Cas9-recom-r                                                            | GGTTCAATTGCGATTCATGTGGTGCAGCAGTCTTTGCTCTAGAAAAGAAGGATTACCTCTAAAC                                |
| PKS1gRNA-f                                                              | TCTTTGAAAAGATAATGTATGATTATGCTTTCACTC                                                            |
| PKS1gRNA-r                                                              | CCTATTTAACTTGCTATTTCTAGCTCTAAAACCTCGTTTAGTTGTTGCAGTGGATCATTTATCTTTCACTGCGGAGAAG<br>TTTCGAACGCC  |
| SDH1-sg-r                                                               | CCTATTTAACTTGCTATTTCTAGCTCTAAAACGAGCTTGTGCGAGGAAGGAGCGATCATTTATCTTTCACTGCGGAGAA<br>GTTTCGAACGCC |
| gRNAto315Cas-R                                                          | GTTCAATTGCGATTCATGTGGTGCAGCAGTCTTTGCTCTTTGAAAAGATAATGTATGATTATGCTTTCACTC                        |
| sgRNA-rec-R                                                             | GAGCAGTCTTTGCTCTAGAAAAGAAGGATTACCTCTAACAGACATAAAAAACAAAAAAGCACCACCGACTCGG                       |
| <u>Primers used as templates for sgRNA synthesis</u>                    |                                                                                                 |
| sgSDI1                                                                  | TTCTAATACGACTCACTATAGAATGGTGTGGCAACGGTACGTTTTAGAGCTAGA                                          |
| SgTUB2                                                                  | TTCTAATACGACTCACTATAGACCAGCTGGTGGACCGAGAGTTTTAGAGCTAGA                                          |
| sgILV2                                                                  | TTCTAATACGACTCACTATAGGCGTCGCTTCCAATAGCAGGTTTTAGAGCTAGA                                          |
| Sg-SEP5-n-gfp                                                           | TTCTAATACGACTCACTATAGAACTTGAAAGGAATTTGGTGTTTTAGAGCTAGA                                          |
| sgSEP5ts                                                                | TTCTAATACGACTCACTATAGTCTGTGGAGCCTCAGGAACGTTTTAGAGCTAGA                                          |
| sgSDH1                                                                  | TTCTAATACGACTCACTATAGCTCCTTCTCGACAAGCTCGTTTTAGAGCTAGA                                           |
| sgPKS-2                                                                 | TTCTAATACGACTCACTATAGCGTGGTACGGGCCGTAGACGTTTTAGAGCTAGA                                          |
| <u>Primers used for PCR amplification of donor DNAs with BAR or GFP</u> |                                                                                                 |
| ALB-BARkoF                                                              | GCCGCCACAAGCTCCCTACCAAGGCCACGGCCATCCCGTCTGACAGAAGATGATATTGAAGGAGC                               |
| ALB-BARkoR                                                              | GCAGAGCCTCTTGATGAAACCTTGAAGCTGCTGGCCTGGTGCACCTAAATCTCGGTGACGG                                   |

---

|               |                                                                                      |
|---------------|--------------------------------------------------------------------------------------|
| ALB-BARkoS-f  | AAGCTCCCTCACCAAGGCCACGGCCATCCCGGTCGTCGACAGAAGATGATATTGAAGGAGC                        |
| ALB-BARkos-r  | TTGCATGAAACCTTGAAGCTGCTTGGCCTGGTCGACCTAAATCTCGGTGACGG                                |
| SEP5-N-GFP-f  | CAACATCGATCTAACCAACCAAATTCCTTTCAAGTTCAACACATGGTGAGCAAGGGCGAG                         |
| SEP5-N-GFP-r  | gaaacgggtccagaaggttgcggtcaactacGGCGGGAAACGACATCTTGTACAGCTCGTCCATGCC                  |
|               | <u>Primers used to anneal together to form dsDNA donor DNAs</u>                      |
| Alb-(1)top    | CTCCCTCACCAAGGCCACGGCCATCCCGGTCTACGGCCCGTAGACGCCCCCACCTCCACCGCCCTGAGGATGTCGA<br>C    |
| Alb-(1)bot    | GTCGACATCCTCAGGGCGGTGGAGGTGGGGGGCGTGCTACGGGCCGTAGACCGGGATGGCCGTGGCCTTGGTGAG<br>GGAG  |
| Alb1-(2)top   | CTCCCTCACCAAGGCCACGGCCATCCCGGTCTACGGCCCGTACCACGCCCCCACCTCCACCGCCCTTAGGATGTCGAC       |
| Alb-(2)bot    | GTCGACATCCTAAGGGCGGTGGAGGTGGGGGGCGTGCTACGGGCCGTAGACCGGGATGGCCGTGGCCTTGGTGAG<br>GGAG  |
| SDI1-80bp-top | CGCCTGGCCCTTGACAACTCCATGAGCCTGTACCGTTGCCTCACCATTCTTAACTGCACAAGGACCTGCCCGAAGGGC<br>CT |
| SDI1-80bp-bot | AGGCCCTTCGGGCAGGTCCTTGTGCAGTTAAGAATGGTGAGGCAACGGTACAGGCTCATGGAGTTGTCAAGGGCCA<br>GGCG |
| SDI1-60bp-top | TTGACAACTCCATGAGCCTGTACCGTTGCCTCACCATTCTTAACTGCACAAGGACCTGCC                         |
| SDI1-60bp-bot | GGCAGGTCCTTGTGCAGTTAAGAATGGTGAGGCAACGGTACAGGCTCATGGAGTTGTCAA                         |
| SDI1-50bp-top | TTGACAACTCCATGAGCCTGTACCGTTGCCTCACCATTCTTAACTGCACA                                   |
| SDI1-50bp-bot | TGTGCAGTTAAGAATGGTGAGGCAACGGTACAGGCTCATGGAGTTGTCAA                                   |
| SDI1-40bp-top | TTGACAACTCCATGAGCCTGTACCGTTGCCTCACCATTCT                                             |
| SDI1-40bp-bot | AGAATGGTGAGGCAACGGTACAGGCTCATGGAGTTGTCAA                                             |
| SDI1-30bp-top | AACTCCATGAGCCTGTACCGTTGCCTCACC                                                       |
| SDI1-30bp-bot | GGTGAGGCAACGGTACAGGCTCATGGAGTT                                                       |
| SDI1-20bp-top | GAGCCTGTACCGTTGCCTCA                                                                 |
| SDI1-20bp-bot | TGAGGCAACGGTACAGGCTC                                                                 |
| benR-top      | GTCGTTGAGCCCTACAACGCTACCCTCTCGGTCCACCAGCTGGTCGAGAACTCTGACGcGACCTTCTGCATTGACAAC<br>GA |

---

---

|                   |                                                                                                                                                   |
|-------------------|---------------------------------------------------------------------------------------------------------------------------------------------------|
| benR-bot          | TCGTTGTC AATGCAGAAGGTCgCGTCAGAGTTCTCGACCAGCTGGTGGACCGAGAGGGTAGCGTTGTAGGGCTCAAC<br>GAC                                                             |
| TUB2-wt-top       | GTCGTTGAGCCCTACAACGCTACCCTCTCGGTCCACCAGCTGGTCGAGAACTCTGACGAGACCTTCTGCATTGACAAC<br>GA                                                              |
| TUB2-wt-bot       | TCGTTGTC AATGCAGAAGGTCCTCGTCAGAGTTCTCGACCAGCTGGTGGACCGAGAGGGTAGCGTTGTAGGGCTCAAC<br>GAC                                                            |
| SURtop            | GTATTCTCAGGACAGGTTGTTACCTCTGaTATTGGAAGCGACGCCTCCAGGAGGCCGACGTCATAGGCATCTCCCGG<br>TC                                                               |
| SURbot            | GACCGGGAGATGCCTATGACGTGGCCTCCTGGAAGGCGTCGCTTCCAATAtCAGAGGTAACAACCTGTCCTGAGAA<br>TAC                                                               |
| Sep5-ts-donor-top | GAAGGGGATT CAGTTCTGTCTGATGGTCTGTgagGCCTCAGGAACTGgtgagttGCAGGACTACCTTCGTCAACACTCTT                                                                 |
| Sep5-ts-donor-bot | AAGAGTGTTGACGAAGGTAGTCCTGCaactcacCAGTTCCTGAGGCctcACAGACCATCAGACAGAACTGAATCCCCTTC<br>Primers used for generating PCR products to confirm mutations |
| PKS-ck-f          | GGATTCCTCGCCGAGTTCTAC                                                                                                                             |
| PKS-ck-r          | CAATCATCTCGGGGTTGTTGAGG                                                                                                                           |
| SEP6ts?-f         | CACACCCTGAAGCCCCTTGATATC                                                                                                                          |
| SEP6ts?-R         | CTCCTCGGTTGTGTGGATGAG                                                                                                                             |

---

134

135

136
